# Supplementary material for: Seed germination and vegetative and in vitro propagation of Hieracium lucidum subsp. lucidum (Asteraceae), a critically endangered endemic taxon of the Sicilian flora
Source: PeerJ. 2024 Feb 9;12:e16839. doi: 10.7717/peerj.16839 (PMC10860557; doi:10.7717/peerj.16839)
Supplement: Supplemental Information 2 [file peerj-12-16839-s002.xlsx]

## Sheet: Table 3
2020
		DAYS	1	2	3	4	5	6	7	8	9	10	11	12	13	14	15	16	17	18	19	20	21	22	TOT	G	T1	T50	Tmax	MTG
15°C	H20	No. seeds germinated	0	0	0	0	1	3	2	3	4	3	2	0	0	0	1	0	0	0	0	0	0	0	19	95	5	8.2	15	8.63158
15°C	H20 + GA3	No. seeds germinated	0	0	0	0	2	3	2	2	5	2	2	0	0	0	1	0	0	0	0	0	0	0	19	95	5	8.1	15	8.42105
20°C	H20	No. seeds germinated	0	0	0	0	0	2	0	2	2	3	3	0	3	0	2	1	0	0	0	0	0	0	18	90	6	10	16	10.7778
20°C	H20 + GA3	No. seeds germinated	0	0	0	0	2	0	3	2	0	0	2	5	3	1	0	1	0	0	0	0	0	0	19	95	5	8.1	16	10.4211
25°C	H20	No. seeds germinated	0	0	0	0	0	0	1	0	2	2	2	4	0	3	0	0	1	0	0	0	1	0	16	80	7	11.2	21	12.1875
25°C	H20 + GA3	No. seeds germinated	0	0	0	0	0	1	0	2	2	2	0	5	2	0	0	1	0	0	0	1	0	0	16	80	6	10.4	20	11.375
30/15°C	H20	No. seeds germinated	0	0	0	0	0	0	1	0	2	0	2	1	2	0	0	3	0	0	2	0	0	1	14	70	7	12.5	22	13.7857
30/15°C	H20 + GA3	No. seeds germinated	0	0	0	0	0	1	0	2	2	1	0	4	0	3	0	1	0	0	0	1	0	0	15	75	6	10.7	20	11.7333
2021
Temp		days	1	2	3	4	5	6	7	8	9	10	11	12	13	14	15	16	17	18	19	20	21	22	TOT	G	T1	T50	Tmax	MTG
15°C	H20	No. seeds germinated	0	0	0	0	1	0	2	2	3	4	0	2	0	3	1	0	0	0	0	0	0	0	18	90	5	9.2	15	10.1667
15°C	H20 + GA3	No. seeds germinated	0	0	0	0	2	0	2	2	2	5	0	3	0	1	1	0	0	0	0	0	0	0	18	90	5	9.2	15	9.61111
20°C	H20	No. seeds germinated	0	0	0	0	0	1	0	2	0	3	4	3	0	0	0	2	1	1	0	0	0	0	17	85	6	10.6	18	11.7059
20°C	H20 + GA3	No. seeds germinated	0	0	0	0	1	0	2	0	3	0	5	2	1	2	0	1	0	0	0	0	0	0	17	85	5	10	16	10.7059
25°C	H20	No. seeds germinated	0	0	0	0	0	1	0	0	2	2	2	4	0	2	0	0	2	0	0	1	0	0	16	80	6	11.2	20	12.25
25°C	H20 + GA3	No. seeds germinated	0	0	0	0	0	1	0	1	2	3	5	2	0	0	0	0	0	1	1	0	0	0	16	80	6	10.2	19	11.125
30/15°C	H20	No. seeds germinated	0	0	0	0	0	0	2	0	0	2	1	1	3	0	2	0	0	2	0	0	1	0	14	70	7	12.3	21	13.0714
30/15°C	H20 + GA3	No. seeds germinated	0	0	0	0	0	0	2	0	0	2	2	3	0	2	0	2	0	1	1	0	0	0	15	75	7	11.5	19	12.6

## Sheet: Table 4
Temp		days	1	2	3	4	5	6	7	8	9	10	11	12	13	14	15	16	17	18	19	20	21	22	TOT	G	T1	T50	Tmax	MTG
15°C	H20	No. seeds germinated	0	0	0	0	1	0	2	2	3	4	0	2	0	3	1	0	0	0	0	0	0	0	18	90	5	9.2	15	10.1667
15°C	H20 + GA3	No. seeds germinated	0	0	0	0	2	0	2	2	2	5	0	3	0	1	1	0	0	0	0	0	0	0	18	90	5	9.2	15	9.61111
20°C	H20	No. seeds germinated	0	0	0	0	0	1	0	2	0	3	4	3	0	0	0	2	1	1	0	0	0	0	17	85	6	10.6	18	11.7059
20°C	H20 + GA3	No. seeds germinated	0	0	0	0	1	0	2	0	3	0	5	2	1	2	0	1	0	0	0	0	0	0	17	85	5	10	16	10.7059
25°C	H20	No. seeds germinated	0	0	0	0	0	1	0	0	2	2	2	4	0	2	0	0	2	0	0	1	0	0	16	80	6	11.2	20	12.25
25°C	H20 + GA3	No. seeds germinated	0	0	0	0	0	1	0	1	2	3	5	2	0	0	0	0	0	1	1	0	0	0	16	80	6	10.2	19	11.125
30/15°C	H20	No. seeds germinated	0	0	0	0	0	0	2	0	0	2	1	1	3	0	2	0	0	2	0	0	1	0	14	70	7	12.3	21	13.0714
30/15°C	H20 + GA3	No. seeds germinated	0	0	0	0	0	0	2	0	0	2	2	3	0	2	0	2	0	1	1	0	0	0	15	75	7	11.5	19	12.6
