# Supplementary material for: Seed germination and vegetative and in vitro propagation of Hieracium lucidum subsp. lucidum (Asteraceae), a critically endangered endemic taxon of the Sicilian flora
Source: PeerJ. 2024 Feb 9;12:e16839. doi: 10.7717/peerj.16839 (PMC10860557; doi:10.7717/peerj.16839)
Supplement: Supplemental Information 3 [file peerj-12-16839-s003.xlsx]

## Sheet: CALLUS PERCENTAGE
Hieracium lucidum subsp. lucidum
MEDIUM	NUMBER PETRI DISHE	NUMBER OF EXPLANTS	PERCETAGE OF EXPLANTS PRODUCING CALLUS
MSO	1	8	0
MSO	2	8	0
MSO	3	8	0
MSO	4	8	0
MSO	5	8	0
MSO	6	8	0
MSO	7	8	0
B1	1	8	0.5
B1	2	8	0
B1	3	8	0.1
B1	4	8	0.3
B1	5	8	0
B1	6	8	0
B1	7	8	0
B2	1	8	0.1
B2	2	8	0.05
B2	3	8	0.05
B2	4	8	0.1
B2	5	8	0.5
B2	6	8	0.4
B2	7	8	0.3
B3	1	8	0.4
B3	2	8	0.5
B3	3	8	0.3
B3	4	8	0.2
B3	5	8	0
B3	6	8	0.2
B3	7	8	0.5
B4	1	8	0.8
B4	2	8	0.4
B4	3	8	0.05
B4	4	8	0
B4	5	8	0.5
B4	6	8	0.5
B4	7	8	0.5
MT1	1	8	0.1
MT1	2	8	0.05
MT1	3	8	1
MT1	4	8	0.8
MT1	5	8	0.4
MT1	6	8	0.8
MT1	7	8	0.3
MT2	1	8	0.8
MT2	2	8	0.4
MT2	3	8	0.05
MT2	4	8	0.8
MT2	5	8	0.5
MT2	6	8	0.5
MT2	7	8	0.5
MT3	1	8	0.5
MT3	2	8	1
MT3	3	8	0.5
MT3	4	8	0.9
MT3	5	8	1
MT3	6	8	0.8
MT3	7	8	0.5
MT4	1	8	0.4
MT4	2	8	0.9
MT4	3	8	1
MT4	4	8	1
MT4	5	8	1
MT4	6	8	0.8
MT4	7	8	0.9

## Sheet: NUMBER OF SHOOTS
Hieracium lucidum subsp. lucidum
MEDIUM	NUMBER PETRI DISHE	NUMBER OF EXPLANTS	NUMBER OF SHOOTS PER EXPLANT
MSO	1	8	0
MSO	2	8	0
MSO	3	8	0
MSO	4	8	0
MSO	5	8	0
MSO	6	8	0
MSO	7	8	0
B1	1	1	9
B1		2	10
B1		3	8
B1		4	9
B1		5	12
B1		6	8
B1		7	9
B1		8	12
B1	2	1	0
B1		2	0
B1		3	0
B1		4	0
B1		5	0
B1		6	0
B1		7	0
B1		8	0
B1	3	1	10
B1		2	9
B1		3	11
B1		4	9
B1		5	12
B1		6	8
B1		7	7
B1		8	8
B1	4	1	10
B1		2	5
B1		3	6
B1		4	7
B1		5	10
B1		6	8
B1		7	8
B1		8	11
B1	5	1	0
B1		2	0
B1		3	0
B1		4	0
B1		5	0
B1		6	0
B1		7	0
B1		8	0
B1	6	1	0
B1		2	0
B1		3	0
B1		4	0
B1		5	0
B1		6	0
B1		7	0
B1		8	0
B1	7	1	0
B1		2	0
B1		3	0
B1		4	0
B1		5	0
B1		6	0
B1		7	0
B1		8	0
B2	1	1	1
B2		2	2
B2		3	3
B2		4	2
B2		5	1
B2		6	1
B2		7	3
B2		8	4
B2	2	1	1
B2		2	2
B2		3	3
B2		4	1
B2		5	1
B2		6	1
B2		7	1
B2		8	2
B2	3	1	1
B2		2	2
B2		3	3
B2		4	1
B2		5	1
B2		6	1
B2		7	2
B2		8	1
B2	4	1	3
B2		2	1
B2		3	5
B2		4	2
B2		5	4
B2		6	1
B2		7	1
B2		8	1
B2	5	1	8
B2		2	7
B2		3	13
B2		4	11
B2		5	8
B2		6	9
B2		7	8
B2		8	9
B2	6	1	8
B2		2	8
B2		3	9
B2		4	10
B2		5	11
B2		6	8
B2		7	6
B2		8	4
B2	7	1	3
B2		2	1
B2		3	4
B2		4	2
B2		5	5
B2		6	6
B2		7	7
B2		8	8
B3	1	1	9
B3		2	7
B3		3	1
B3		4	3
B3		5	5
B3		6	4
B3		7	1
B3		8	2
B3	2	1	3
B3		2	1
B3		3	5
B3		4	4
B3		5	3
B3		6	3
B3		7	2
B3		8	1
B3	3	1	3
B3		2	1
B3		3	10
B3		4	8
B3		5	7
B3		6	6
B3		7	8
B3		8	3
B3	4	1	4
B3		2	5
B3		3	10
B3		4	9
B3		5	7
B3		6	8
B3		7	4
B3		8	4
B3	5	1	8
B3		2	7
B3		3	13
B3		4	11
B3		5	7
B3		6	9
B3		7	7
B3		8	9
B3	6	1	0
B3		2	0
B3		3	0
B3		4	0
B3		5	0
B3		6	0
B3		7	0
B3		8	0
B3	7	1	3
B3		2	1
B3		3	4
B3		4	2
B3		5	4
B3		6	5
B3		7	9
B3		8	6
B4	1	1	10
B4		2	9
B4		3	7
B4		4	6
B4		5	5
B4		6	8
B4		7	10
B4		8	2
B4	2	1	8
B4		2	9
B4		3	7
B4		4	5
B4		5	4
B4		6	10
B4		7	3
B4		8	1
B4	3	1	1
B4		2	2
B4		3	3
B4		4	1
B4		5	5
B4		6	2
B4		7	3
B4		8	1
B4	4	1	0
B4		2	0
B4		3	0
B4		4	0
B4		5	0
B4		6	0
B4		7	0
B4		8	0
B4	5	1	10
B4		2	8
B4		3	9
B4		4	5
B4		5	4
B4		6	6
B4		7	3
B4		8	1
B4	6	1	5
B4		2	12
B4		3	9
B4		4	8
B4		5	8
B4		6	4
B4		7	8
B4		8	3
B4	7	1	2
B4		2	5
B4		3	7
B4		4	4
B4		5	8
B4		6	6
B4		7	8
B4		8	7
MT1	1	1	1
MT1		2	3
MT1		3	5
MT1		4	6
MT1		5	2
MT1		6	6
MT1		7	7
MT1		8	4
MT1	2	1	1
MT1		2	2
MT1		3	3
MT1		4	3
MT1		5	3
MT1		6	1
MT1		7	1
MT1		8	8
MT1	3	1	11
MT1		2	8
MT1		3	10
MT1		4	12
MT1		5	11
MT1		6	6
MT1		7	8
MT1		8	12
MT1	4	1	10
MT1		2	11
MT1		3	9
MT1		4	8
MT1		5	9
MT1		6	7
MT1		7	9
MT1		8	10
MT1	5	1	8
MT1		2	6
MT1		3	5
MT1		4	4
MT1		5	3
MT1		6	3
MT1		7	1
MT1		8	1
MT1	6	1	8
MT1		2	6
MT1		3	10
MT1		4	2
MT1		5	8
MT1		6	7
MT1		7	9
MT1		8	10
MT1	7	1	8
MT1		2	9
MT1		3	10
MT1		4	10
MT1		5	5
MT1		6	5
MT1		7	4
MT1		8	3
MT2	1	1	11
MT2		2	10
MT2		3	5
MT2		4	9
MT2		5	8
MT2		6	10
MT2		7	11
MT2		8	10
MT2	2	1	5
MT2		2	10
MT2		3	6
MT2		4	5
MT2		5	12
MT2		6	8
MT2		7	10
MT2		8	6
MT2	3	1	1
MT2		2	2
MT2		3	3
MT2		4	1
MT2		5	1
MT2		6	2
MT2		7	4
MT2		8	1
MT2	4	1	11
MT2		2	9
MT2		3	10
MT2		4	8
MT2		5	10
MT2		6	10
MT2		7	7
MT2		8	12
MT2	5	1	9
MT2		2	10
MT2		3	11
MT2		4	12
MT2		5	7
MT2		6	8
MT2		7	9
MT2		8	5
MT2	6	1	11
MT2		2	10
MT2		3	9
MT2		4	10
MT2		5	10
MT2		6	9
MT2		7	5
MT2		8	9
MT2	7	1	8
MT2		2	11
MT2		3	5
MT2		4	6
MT2		5	1
MT2		6	4
MT2		7	9
MT2		8	8
MT3	1	1	19
MT3		2	11
MT3		3	15
MT3		4	10
MT3		5	10
MT3		6	3
MT3		7	1
MT3		8	2
MT3	2	1	12
MT3		2	15
MT3		3	14
MT3		4	12
MT3		5	9
MT3		6	7
MT3		7	5
MT3		8	18
MT3	3	1	9
MT3		2	15
MT3		3	12
MT3		4	10
MT3		5	10
MT3		6	9
MT3		7	10
MT3		8	12
MT3	4	1	19
MT3		2	10
MT3		3	15
MT3		4	10
MT3		5	12
MT3		6	11
MT3		7	12
MT3		8	11
MT3	5	1	10
MT3		2	13
MT3		3	18
MT3		4	12
MT3		5	15
MT3		6	14
MT3		7	11
MT3		8	12
MT3	6	1	15
MT3		2	10
MT3		3	11
MT3		4	9
MT3		5	11
MT3		6	12
MT3		7	9
MT3		8	8
MT3	7	1	10
MT3		2	11
MT3		3	12
MT3		4	15
MT3		5	16
MT3		6	7
MT3		7	10
MT3		8	11
MT4	1	1	15
MT4		2	12
MT4		3	14
MT4		4	15
MT4		5	8
MT4		6	10
MT4		7	15
MT4		8	19
MT4	2	1	10
MT4		2	19
MT4		3	13
MT4		4	18
MT4		5	19
MT4		6	18
MT4		7	19
MT4		8	10
MT4	3	1	8
MT4		2	7
MT4		3	6
MT4		4	1
MT4		5	18
MT4		6	19
MT4		7	12
MT4		8	19
MT4	4	1	15
MT4		2	12
MT4		3	11
MT4		4	15
MT4		5	11
MT4		6	10
MT4		7	13
MT4		8	17
MT4	5	1	18
MT4		2	16
MT4		3	19
MT4		4	15
MT4		5	17
MT4		6	15
MT4		7	8
MT4		8	10
MT4	6	1	15
MT4		2	19
MT4		3	15
MT4		4	16
MT4		5	18
MT4		6	19
MT4		7	19
MT4		8	15
MT4	7	1	8
MT4		2	18
MT4		3	15
MT4		4	19
MT4		5	19
MT4		6	14
MT4		7	16
MT4		8	17

## Sheet: ROOTING PERCENTAGE 
Hieracium lucidum subsp. lucidum
MEDIUM	NUMBER PETRI DISHE	NUMBER OF EXPLANTS	NUMBER OF EXPLANTS THAT HAVE GIVEN ROOTS
MSO	1	8	8
MSO	2	8	8
MSO	3	8	8
MSO	4	8	8
MSO	5	8	7
MSO	6	8	8
MSO	7	8	8
R1	1	8	8
R1	2	8	8
R1	3	8	5
R1	4	8	0
R1	5	8	7
R1	6	8	8
R1	7	8	6
R2	1	8	5
R2	2	8	7
R2	3	8	5
R2	4	8	6
R2	5	8	8
R2	6	8	8
R2	7	8	8
R3	1	8	8
R3	2	8	2
R3	3	8	5
R3	4	8	4
R3	5	8	3
R3	6	8	1
R3	7	8	1
R4	1	8	8
R4	2	8	8
R4	3	8	6
R4	4	8	4
R4	5	8	0
R4	6	8	2
R4	7	8	1
			55

## Sheet: NUMBER OF ROOTS
Hieracium lucidum subsp. lucidum
MEDIUM	NUMBER PETRI DISHE	NUMBER OF EXPLANTS	NUMBER OF ROOTS
MSO	1	1	10
MSO		2	9
MSO		3	10
MSO		4	8
MSO		5	10
MSO		6	9
MSO		7	9
MSO		8	10
MSO	2	1	10
MSO		2	8
MSO		3	7
MSO		4	10
MSO		5	9
MSO		6	10
MSO		7	10
MSO		8	10
MSO	3	1	9
MSO		2	10
MSO		3	9
MSO		4	11
MSO		5	10
MSO		6	9
MSO		7	9
MSO		8	10
MSO	4	1	10
MSO		2	11
MSO		3	7
MSO		4	10
MSO		5	10
MSO		6	8
MSO		7	8
MSO		8	10
MSO	5	1	12
MSO		2	5
MSO		3	10
MSO		4	9
MSO		5	10
MSO		6	9
MSO		7	10
MSO		8	9
MSO	6	1	10
MSO		2	8
MSO		3	9
MSO		4	11
MSO		5	10
MSO		6	8
MSO		7	9
MSO		8	5
MSO	7	1	10
MSO		2	9
MSO		3	10
MSO		4	10
MSO		5	11
MSO		6	12
MSO		7	7
MSO		8	14
R1	1	1	8
R1		2	5
R1		3	3
R1		4	5
R1		5	8
R1		6	2
R1		7	1
R1		8	5
R1	2	1	6
R1		2	5
R1		3	7
R1		4	4
R1		5	7
R1		6	9
R1		7	3
R1		8	5
R1	3	1	8
R1		2	2
R1		3	1
R1		4	5
R1		5	10
R1		6	8
R1		7	2
R1		8	15
R1	4	1	8
R1		2	4
R1		3	0
R1		4	10
R1		5	9
R1		6	8
R1		7	5
R1		8	7
R1	5	1	6
R1		2	7
R1		3	6
R1		4	2
R1		5	5
R1		6	5
R1		7	8
R1		8	3
R1	6	1	4
R1		2	4
R1		3	6
R1		4	8
R1		5	10
R1		6	5
R1		7	10
R1		8	6
R1	7	1	8
R1		2	9
R1		3	10
R1		4	7
R1		5	6
R1		6	9
R1		7	8
R1		8	5
R2	1	1	8
R2		2	9
R2		3	5
R2		4	12
R2		5	10
R2		6	6
R2		7	8
R2		8	5
R2	2	1	6
R2		2	7
R2		3	7
R2		4	3
R2		5	9
R2		6	10
R2		7	5
R2		8	8
R2	3	1	8
R2		2	6
R2		3	9
R2		4	6
R2		5	9
R2		6	8
R2		7	9
R2		8	8
R2	4	1	8
R2		2	10
R2		3	11
R2		4	9
R2		5	7
R2		6	8
R2		7	5
R2		8	10
R2	5	1	9
R2		2	10
R2		3	12
R2		4	11
R2		5	7
R2		6	10
R2		7	7
R2		8	9
R2	6	1	10
R2		2	11
R2		3	9
R2		4	8
R2		5	10
R2		6	10
R2		7	11
R2		8	8
R2	7	1	11
R2		2	10
R2		3	15
R2		4	10
R2		5	8
R2		6	9
R2		7	8
R2		8	9
R3	1	1	8
R3		2	9
R3		3	0
R3		4	5
R3		5	3
R3		6	2
R3		7	1
R3		8	5
R3	2	1	6
R3		2	4
R3		3	2
R3		4	5
R3		5	6
R3		6	7
R3		7	5
R3		8	9
R3	3	1	5
R3		2	0
R3		3	1
R3		4	5
R3		5	7
R3		6	5
R3		7	2
R3		8	5
R3	4	1	5
R3		2	5
R3		3	4
R3		4	3
R3		5	0
R3		6	8
R3		7	5
R3		8	8
R3	5	1	8
R3		2	7
R3		3	5
R3		4	4
R3		5	5
R3		6	9
R3		7	8
R3		8	8
R3	6	1	4
R3		2	5
R3		3	0
R3		4	6
R3		5	4
R3		6	3
R3		7	0
R3		8	3
R3	7	1	5
R3		2	1
R3		3	3
R3		4	2
R3		5	5
R3		6	0
R3		7	0
R3		8	8
R4	1	1	7
R4		2	5
R4		3	4
R4		4	6
R4		5	5
R4		6	6
R4		7	0
R4		8	3
R4	2	1	6
R4		2	5
R4		3	5
R4		4	1
R4		5	9
R4		6	0
R4		7	3
R4		8	6
R4	3	1	5
R4		2	4
R4		3	1
R4		4	5
R4		5	0
R4		6	5
R4		7	2
R4		8	2
R4	4	1	3
R4		2	5
R4		3	4
R4		4	6
R4		5	5
R4		6	0
R4		7	5
R4		8	1
R4	5	1	3
R4		2	6
R4		3	6
R4		4	6
R4		5	0
R4		6	5
R4		7	3
R4		8	2
R4	6	1	4
R4		2	6
R4		3	4
R4		4	6
R4		5	4
R4		6	5
R4		7	6
R4		8	0
R4	7	1	4
R4		2	2
R4		3	3
R4		4	2
R4		5	4
R4		6	0
R4		7	6
R4		8	5

## Sheet: ROOTS LENGTH
Hieracium lucidum subsp. lucidum
MEDIUM	NUMBER PETRI DISHE	NUMBER OF EXPLANTS	NUMBER OF ROOTS	LENGTH OF ROOTS	MEDIUM	NUMBER PETRI DISHE	NUMBER OF EXPLANTS	NUMBER OF ROOTS	LENGTH OF ROOTS	MEDIUM	NUMBER PETRI DISHE	NUMBER OF EXPLANTS	NUMBER OF ROOTS	LENGTH OF ROOTS	MEDIUM	NUMBER PETRI DISHE	NUMBER OF EXPLANTS	NUMBER OF ROOTS	LENGTH OF ROOTS	MEDIUM	NUMBER PETRI DISHE	NUMBER OF EXPLANTS	NUMBER OF ROOTS	LENGTH OF ROOTS
MSO	1	1	10	1.5	R1	1	1	8	1.2	R2	1	1	8	2	R3	1	1	8	0.9	R4	1	1	7	0.5
MSO				3.5	R1				0.3	R2				0.9	R3				0.5	R4				1
MSO				2.8	R1				1	R2				1	R3				0.3	R4				0.5
MSO				1.2	R1				0.9	R2				1.8	R3				1	R4				0.5
MSO				1.5	R1				0.5	R2				0.9	R3				0.5	R4				0.8
MSO				1	R1				0.5	R2				0.5	R3				1	R4				0.5
MSO				1.5	R1				0.8	R2				0.3	R3				0.5	R4				0.6
MSO				1	R1				0.9	R2				1	R3				0.5	R4		2	5	1
MSO				0.9	R1		2	5	1	R2				0.5	R3		2	9	0.8	R4				0.8
MSO				1	R1				0.9	R2		2	9	1	R3				0.5	R4				0.6
MSO		2	9	3	R1				0.5	R2				2.5	R3				0.6	R4				0.9
MSO				2.2	R1				0.5	R2				1.6	R3				0.6	R4				0.8
MSO				1.8	R1				0.3	R2				1.3	R3				0.2	R4		3	4	1
MSO				2.9	R1		3	3	1	R2				1.5	R3				0.3	R4				0.9
MSO				1.5	R1				0.5	R2				1	R3				0.2	R4				0.5
MSO				2	R1				0.9	R2				1	R3				0.3	R4				0.6
MSO				2	R1		4	5	1.3	R2				0.9	R3				0.2	R4		4	6	0.8
MSO				1.2	R1				1.5	R2				1.3	R3		3	0	0	R4				0.6
MSO				1	R1				1	R2		3	5	1	R3		4	5	0.6	R4				0.5
MSO		3	10	2.3	R1				1	R2				1.5	R3				0.8	R4				0.8
MSO				1.5	R1				0.9	R2				0.9	R3				0.6	R4				0.9
MSO				3	R1		5	8	1.3	R2				0.8	R3				0.3	R4				0.9
MSO				2	R1				1	R2				1.9	R3				0.2	R4		5	5	0.8
MSO				1	R1				0.5	R2		4	12	1	R3		5	3	1	R4				0.6
MSO				1.2	R1				0.9	R2				1.5	R3				0.5	R4				0.3
MSO				2.9	R1				0.5	R2				1.5	R3				0.6	R4				0.2
MSO				1.9	R1				0.6	R2				0.9	R3		6	2	0.8	R4				1
MSO				1.5	R1				0.7	R2				1	R3				0.3	R4		6	6	0.8
MSO				1	R1				0.9	R2				1.3	R3		7	1	0.5	R4				0.6
MSO		4	8	0.9	R1		6	2	1	R2				1	R3		8	5	0.8	R4				0.3
MSO				1	R1				0.5	R2				1.2	R3				0.6	R4				0.5
MSO				1.2	R1		7	1	1	R2				1	R3				0.3	R4				0.4
MSO				1.5	R1		8	5	1	R2				3	R3				0.5	R4				0.5
MSO				1.6	R1				0.5	R2				0.9	R3				0.4	R4		7	0	0
MSO				1.5	R1				0.9	R2				1	R3	2	1	6	0.5	R4		8	3	0.9
MSO				1	R1				0.8	R2		5	10	1.5	R3				0.3	R4				0.8
MSO				1.3	R1				1	R2				1	R3				0.6	R4				0.8
MSO		5	10	1	R1	2	1	6	0.5	R2				1.3	R3				0.8	R4	2	1	6	0.2
MSO				1.5	R1				0.5	R2				1	R3				0.6	R4				0.3
MSO				1.9	R1				1	R2				0.5	R3				0.2	R4				0.9
MSO				1	R1				1.5	R2				0.3	R3		2	4	0.3	R4				1
MSO				1.5	R1				1.5	R2				1.9	R3				0.2	R4				0.5
MSO				1.5	R1				0.9	R2				1	R3				0.2	R4				0.5
MSO				0.9	R1		2	5	1	R2				1	R3				0.3	R4		2	5	0.5
MSO				1	R1				1.3	R2				1.9	R3		3	2	0.4	R4				0.5
MSO				1.2	R1				1	R2		6	6	1.9	R3				0.4	R4				0.5
MSO				1.5	R1				1.2	R2				1.3	R3		4	5	1	R4				0.6
MSO		6	9	1	R1				1	R2				0.5	R3				0.5	R4				0.2
MSO				2.5	R1		3	7	3	R2				1.5	R3				0.3	R4		3	5	1
MSO				3	R1				0.9	R2				1.5	R3				0.2	R4				0.5
MSO				1.3	R1				1	R2				0.9	R3				0.3	R4				1.5
MSO				1	R1				1.2	R2		7	8	0.9	R3		5	6	0.9	R4				1.6
MSO				1.2	R1				1.2	R2				1	R3				1	R4				0.4
MSO				1	R1				1.8	R2				1.2	R3				0.5	R4		4	1	0.9
MSO				1	R1				1.5	R2				1.5	R3				0.5	R4		5	9	1
MSO				1.5	R1		4	4	1	R2				1	R3				0.6	R4				1
MSO		7	9	1.9	R1				1.3	R2				0.3	R3				0.2	R4				0.3
MSO				2.5	R1				1	R2				2.5	R3		6	7	0.2	R4				0.3
MSO				3	R1				0.5	R2				2	R3				0.3	R4				0.5
MSO				0.9	R1		5	7	0.3	R2		8	5	1	R3				0.2	R4				0.2
MSO				1	R1				1.9	R2				0.2	R3				1	R4				1
MSO				1.2	R1				1	R2				0.9	R3				0.5	R4				0.5
MSO				1.2	R1				1	R2				1	R3				0.5	R4				1.5
MSO				1.8	R1				1.9	R2				0.5	R3				0.5	R4		6	0	0
MSO				1.5	R1				1.3	R2	2	1	6	0.5	R3		7	5	0.5	R4		7	3	1.2
MSO		8	10	1	R1				0.5	R2				0.6	R3				0.6	R4				1
MSO				1.2	R1		6	9	1.5	R2				0.2	R3				0.2	R4				0.4
MSO				2	R1				1.5	R2				0.3	R3				0.3	R4		8	6	1
MSO				2.5	R1				0.9	R2				0.2	R3				0.2	R4				0.2
MSO				2.3	R1				1	R2				1	R3		8	9	0.5	R4				0.3
MSO				1.3	R1				1.2	R2		2	7	0.5	R3				1	R4				0.3
MSO				0.9	R1				1.5	R2				0.5	R3				1	R4				1.5
MSO				1	R1				1	R2				0.5	R3				0.3	R4				0.9
MSO				1.9	R1				0.3	R2				1	R3				0.3	R4	3	1	5	0.3
MSO				1	R1				1	R2				0.5	R3				0.5	R4				1.5
MSO	2	1	10	1.5	R1		7	3	1	R2				1.5	R3				0.2	R4				0.9
MSO				3.1	R1				0.2	R2				1	R3				1	R4				0.5
MSO				2.9	R1				0.9	R2		3	7	1.5	R3				0.5	R4				0.9
MSO				2.6	R1		8	5	1	R2				1	R3	3	1	5	1.5	R4		2	4	0.8
MSO				1.9	R1				0.5	R2				0.3	R3				1.6	R4				0.8
MSO				1	R1				0.6	R2				0.9	R3				0.4	R4				0.9
MSO				2	R1				0.2	R2				1.5	R3				0.5	R4				0.9
MSO				1.9	R1				0.3	R2				1	R3				0.2	R4		3	1	1
MSO				1.3	R1				0.2	R2				0.5	R3		2	0	0	R4		4	5	1.2
MSO				0.5	R1	3	1	8	1	R2		4	3	1.5	R3		3	1	0.6	R4				0.8
MSO		2	8	3.5	R1				0.2	R2				1	R3		4	5	1.2	R4				0.2
MSO				3.2	R1				0.2	R2				1.3	R3				1	R4				0.2
MSO				1.5	R1				0.2	R2		5	9	1.5	R3				0.4	R4				1
MSO				1	R1				0.5	R2				1	R3				0.3	R4		5	0	0
MSO				1	R1				0.2	R2				0.5	R3				0.3	R4		6	5	0.9
MSO				0.8	R1				0.2	R2				1	R3		5	7	1	R4				0.8
MSO				0.6	R1				1	R2				1	R3				1	R4				0.8
MSO				0.5	R1		2	2	0.5	R2				0.3	R3				0.5	R4				0.6
MSO		3	7	1.6	R1				0.3	R2				0.3	R3				0.2	R4				0.5
MSO				2	R1		3	1	0.9	R2				0.5	R3				1	R4		7	2	1
MSO				3	R1		4	5	0.2	R2				0.2	R3				0.5	R4				0.6
MSO				3.2	R1				0.2	R2		6	10	1	R3				1.2	R4		8	2	1
MSO				1.2	R1				0.3	R2				0.5	R3		6	5	0.8	R4				1
MSO				1	R1				0.2	R2				1.5	R3				0.2	R4	4	1	3	0.9
MSO				1	R1				0.2	R2				1	R3				0.2	R4				0.3
MSO		4	10	1.6	R1		5	10	1	R2				1.8	R3				1	R4				0.2
MSO				1.3	R1				0.3	R2				0.6	R3				0.2	R4		2	5	1
MSO				2	R1				0.3	R2				2	R3		7	2	0.3	R4				0.2
MSO				1	R1				0.5	R2				0.8	R3				0.3	R4				0.3
MSO				1.8	R1				0.5	R2				0.3	R3		8	5	1.5	R4				0.3
MSO				1.3	R1				0.3	R2				0.5	R3				0.9	R4				1.5
MSO				0.9	R1				0.9	R2		7	5	1.5	R3				0.5	R4		3	4	0.2
MSO				1	R1				0.3	R2				1.5	R3				0.9	R4				1
MSO				1	R1				0.5	R2				0.8	R3				0.3	R4				0.8
MSO				0.7	R1				0.7	R2				0.2	R3	4	1	5	0.5	R4				0.3
MSO		5	9	2	R1		6	8	0.9	R2				0.2	R3				0.9	R4		4	6	1
MSO				1.9	R1				0.3	R2		8	8	0.5	R3				0.3	R4				1.2
MSO				1.8	R1				0.3	R2				1.5	R3				0.2	R4				0.3
MSO				2.5	R1				0.5	R2				1	R3				0.2	R4				0.5
MSO				1.4	R1				0.2	R2				1	R3		2	5	0.6	R4				0.5
MSO				1.8	R1				0.3	R2				0.6	R3				0.6	R4				0.6
MSO				2	R1				0.5	R2				1.3	R3				0.4	R4		5	5	0.4
MSO				0.9	R1				0.5	R2				0.8	R3				0.4	R4				0.4
MSO				1	R1		7	2	0.5	R2				0.3	R3				0.2	R4				0.2
MSO				1	R1				0.5	R2	3	1	8	1	R3		3	4	1	R4				1
MSO		6	10	1.3	R1		8	15	1	R2				1	R3				0.8	R4				0.8
MSO				1.6	R1				0.5	R2				0.6	R3				0.3	R4		6	0	0
MSO				1.3	R1				1.5	R2				2	R3				0.2	R4		7	5	0.3
MSO				3.2	R1				1	R2				1.8	R3		4	3	0.9	R4				1
MSO				0.5	R1				1	R2				0.3	R3				0.5	R4				1
MSO				1	R1				0.6	R2				1.5	R3				0.9	R4				0.6
MSO				1	R1				0.6	R2				0.9	R3		5	0	0	R4				1
MSO				0.9	R1				0.8	R2				0.5	R3		6	8	0.8	R4		8	1	0.5
MSO				1.3	R1				0.3	R2				0.9	R3				0.3	R4	5	1	3	0.8
MSO				1.1	R1				0.5	R2		2	6	2.2	R3				1	R4				0.3
MSO		7	10	2	R1				0.9	R2				1.3	R3				1	R4				0.2
MSO				1.6	R1				0.5	R2				1	R3				0.6	R4		2	6	1
MSO				1.7	R1				0.9	R2				0.9	R3				1	R4				1
MSO				1.2	R1				0.5	R2				0.2	R3				1.2	R4				1
MSO				1	R1				0.3	R2				0.9	R3				0.3	R4				0.6
MSO				1.1	R1	4	1	8	0.2	R2		3	9	1.5	R3		7	5	0.5	R4				0.9
MSO				1.3	R1				0.9	R2				2.2	R3				0.5	R4				0.9
MSO				1.2	R1				0.2	R2				0.9	R3				0.6	R4		3	6	0.5
MSO				1.3	R1				0.8	R2				1.5	R3				0.3	R4				0.2
MSO				1.5	R1				0.5	R2				1.8	R3				0.4	R4				0.9
MSO		8	10	2	R1				0.5	R2				0.9	R3		8	8	0.6	R4				0.3
MSO				1.6	R1				0.5	R2				0.2	R3				0.9	R4				0.8
MSO				1.8	R1				1	R2				0.3	R3				0.9	R4				1.5
MSO				2.3	R1		2	4	1	R2				0.2	R3				0.8	R4		4	6	0.9
MSO				2.4	R1				0.6	R2		4	6	2.3	R3				0.9	R4				0.8
MSO				1.8	R1				0.4	R2				1.5	R3				1	R4				0.5
MSO				1.5	R1				0.4	R2				1	R3				1.5	R4				0.6
MSO				1	R1		3	0	0	R2				1	R3				0.5	R4				0.9
MSO				0.8	R1		4	10	0.5	R2				0.8	R3	5	1	8	0.2	R4				0.9
MSO				0.5	R1				0.9	R2				1	R3				0.9	R4		5	0	0
MSO	3	1	9	1	R1				0.5	R2		5	9	1	R3				0.3	R4		6	5	0.5
MSO				2.2	R1				0.6	R2				0.5	R3				0.8	R4				1.8
MSO				1	R1				0.8	R2				2.3	R3				1.5	R4				1.9
MSO				1.4	R1				0.3	R2				1	R3				0.9	R4				0.5
MSO				1.9	R1				0.2	R2				0.5	R3				0.8	R4				0.3
MSO				1.8	R1				0.2	R2				0.3	R3				0.5	R4		7	3	1
MSO				1.3	R1				0.3	R2				0.3	R3		2	7	0.6	R4				1
MSO				1	R1				0.2	R2				1.6	R3				0.9	R4				0.6
MSO				1.1	R1		5	9	0.7	R2				0.5	R3				0.9	R4		8	2	0.8
MSO		2	10	2	R1				0.8	R2		6	8	1	R3				0.8	R4				0.7
MSO				1.6	R1				1	R2				0.5	R3				0.3	R4	6	1	4	0.9
MSO				1	R1				0.5	R2				1.2	R3				1	R4				1.6
MSO				2.3	R1				0.6	R2				0.9	R3				0.9	R4				1.8
MSO				1	R1				1	R2				1	R3		3	5	0.5	R4				0.5
MSO				2.5	R1				0.5	R2				0.9	R3				0.6	R4		2	6	1
MSO				1.3	R1				0.3	R2				1.5	R3				0.5	R4				1
MSO				1.5	R1				0.3	R2				0.8	R3				0.5	R4				1
MSO				1	R1		6	8	1.6	R2		7	9	1.5	R3				0.3	R4				0.3
MSO				1	R1				0.5	R2				0.9	R3		4	4	0.5	R4				1
MSO		3	9	1.3	R1				0.6	R2				0.8	R3				0.5	R4				0.6
MSO				2.3	R1				0.3	R2				1	R3				0.3	R4		3	4	1.5
MSO				1.3	R1				0.5	R2				0.6	R3				0.2	R4				1.6
MSO				0.7	R1				0.1	R2				0.9	R3		5	5	0.5	R4				0.9
MSO				1	R1				1	R2				0.9	R3				0.3	R4				0.7
MSO				1.5	R1				0.8	R2				0.8	R3				0.9	R4		4	6	1.5
MSO				1.3	R1		7	5	1.4	R2				0.3	R3				0.8	R4				1.6
MSO				1	R1				1	R2		8	8	1.5	R3				0.3	R4				0.5
MSO				1.3	R1				0.5	R2				0.9	R3		6	9	0.9	R4				1
MSO		4	11	2.5	R1				0.9	R2				1.5	R3				0.8	R4				0.5
MSO				1	R1				0.9	R2				1	R3				0.3	R4				0.3
MSO				1.9	R1		8	7	1	R2				0.6	R3				0.5	R4		5	4	1
MSO				2.2	R1				0.9	R2				0.9	R3				0.3	R4				1.1
MSO				1	R1				0.9	R2				0.9	R3				0.3	R4				0.6
MSO				1.6	R1				0.8	R2				0.8	R3				0.3	R4				0.4
MSO				2.1	R1				0.6	R2	4	1	8	0.9	R3				0.2	R4		6	5	1
MSO				1.4	R1				1	R2				1	R3				0.1	R4				1.5
MSO				0.3	R1				1	R2				1.5	R3		7	8	0.9	R4				0.5
MSO				1.9	R1	5	1	6	1.3	R2				0.5	R3				0.8	R4				0.5
MSO				0.1	R1				0.9	R2				1	R3				0.3	R4				0.5
MSO		5	10	1	R1				1.8	R2				0.5	R3				0.5	R4		7	6	0.1
MSO				2.5	R1				1.5	R2				0.6	R3				0.9	R4				1.3
MSO				1.3	R1				0.9	R2				0.5	R3				0.3	R4				1.2
MSO				1.3	R1				0.8	R2		2	10	1.5	R3				1	R4				0.3
MSO				1.3	R1		2	7	1	R2				0.3	R3				0.6	R4				0.5
MSO				2.2	R1				0.6	R2				0.1	R3		8	8	0.5	R4				0.9
MSO				1.8	R1				0.9	R2				1	R3				0.5	R4		8	0	0
MSO				1.5	R1				0.9	R2				0.9	R3				0.5	R4	7	1	4	1.2
MSO				0.9	R1				0.8	R2				0.5	R3				1	R4				1
MSO				0.8	R1				0.3	R2				0.3	R3				0.5	R4				0.9
MSO		6	9	1	R1				0.3	R2				0.9	R3				0.3	R4				0.7
MSO				2.2	R1		3	6	0.1	R2				0.8	R3				1	R4		2	2	1
MSO				1.1	R1				1	R2				0.5	R3				0.9	R4				0.9
MSO				1.3	R1				0.9	R2		3	11	1	R3				0.8	R4		3	3	1.5
MSO				2	R1				0.5	R2				1.2	R3	6	1	4	0.5	R4				1
MSO				1.2	R1				0.3	R2				1.5	R3				0.5	R4				0.7
MSO				1.2	R1				0.3	R2				0.2	R3				0.3	R4		4	2	0.5
MSO				1.8	R1		4	2	0.5	R2				0.5	R3				0.2	R4				0.6
MSO				1.3	R1				0.5	R2				1	R3		2	5	0.5	R4		5	4	0.8
MSO		7	9	1.4	R1		5	5	1	R2				0.5	R3				0.5	R4				0.9
MSO				1.5	R1				0.6	R2				0.9	R3				0.6	R4				0.9
MSO				2.6	R1				0.5	R2				0.5	R3				0.1	R4				0.9
MSO				0.9	R1				0.5	R2				1	R3				0.1	R4		6	0	0
MSO				0.9	R1				0.3	R2				0.3	R3		3	0	0	R4		7	6	1
MSO				0.8	R1		6	5	1	R2		4	9	1.2	R3		4	6	0.5	R4				0.5
MSO				2.1	R1				0.9	R2				1	R3				0.6	R4				0.3
MSO				1	R1				0.5	R2				0.9	R3				0.3	R4				1
MSO				1	R1				0.3	R2				0.8	R3				0.2	R4				0.9
MSO		8	10	1.3	R1				0.9	R2				1	R3				0.2	R4				0.8
MSO				1.3	R1		7	8	0.9	R2				0.9	R3				0.2	R4		8	5	0.8
MSO				2.5	R1				0.9	R2				0.8	R3		5	4	0.5	R4				0.7
MSO				0.9	R1				0.8	R2				1.3	R3				0.5	R4				0.7
MSO				1	R1				0.5	R2				1	R3				0.5	R4				1
MSO				1	R1				0.5	R2		5	7	0.3	R3				0.5	R4				0.5
MSO				2.3	R1				1	R2				0.3	R3		6	3	0.8
MSO				1	R1				0.5	R2				0.3	R3				0.7
MSO				1	R1				0.6	R2				0.2	R3				0.7
MSO				0.9	R1		8	3	0.5	R2				1.2	R3		7	0	0
MSO	4	1	10	2.4	R1				0.5	R2				1	R3		8	3	0.5
MSO				1.9	R1				0.3	R2				1	R3				0.6
MSO				1.8	R1	6	1	4	0.9	R2		6	8	1.5	R3				0.3
MSO				1.5	R1				1	R2				1	R3	7	1	5	0.3
MSO				1.4	R1				0.6	R2				0.5	R3				0.5
MSO				2.3	R1				0.4	R2				0.2	R3				0.5
MSO				0.9	R1		2	4	0.5	R2				0.3	R3				0.5
MSO				1	R1				0.3	R2				1	R3				0.5
MSO				1.2	R1				0.4	R2				1	R3		2	1	0.5
MSO				1	R1				0.5	R2				0.5	R3		3	3	0.8
MSO		2	11	2.5	R1		3	6	1	R2		7	5	0.5	R3				0.3
MSO				2.5	R1				0.5	R2				0.5	R3				0.3
MSO				2.2	R1				0.3	R2				1	R3		4	2	0.5
MSO				1.6	R1				0.4	R2				0.5	R3				0.5
MSO				1.5	R1				0.2	R2				0.3	R3		5	5	0.8
MSO				1.3	R1				0.5	R2		8	10	1	R3				0.8
MSO				1.3	R1		4	8	1	R2				0.9	R3				0.9
MSO				0.6	R1				0.5	R2				0.6	R3				0.5
MSO				1.5	R1				0.9	R2				0.5	R3				0.5
MSO				1.6	R1				0.5	R2				2	R3		6	0	0
MSO				0.3	R1				1	R2				1	R3		7	0	0
MSO		3	7	2.5	R1				0.3	R2				0.9	R3		8	8	0.9
MSO				1.9	R1				0.3	R2				0.5	R3				0.8
MSO				2	R1				0.5	R2				0.5	R3				0.6
MSO				2	R1		5	10	1.2	R2				1.2	R3				0.3
MSO				1.6	R1				1	R2	5	1	9	2	R3				0.3
MSO				0.9	R1				0.9	R2				0.5	R3				0.1
MSO				0.7	R1				0.5	R2				1.2	R3				0.1
MSO		4	10	2	R1				0.5	R2				1	R3				0.2
MSO				2.5	R1				0.9	R2				0.5
MSO				2	R1				1.2	R2				0.3
MSO				1.3	R1				1	R2				1
MSO				1.6	R1				0.9	R2				0.5
MSO				1.6	R1				0.8	R2				1
MSO				1.3	R1		6	5	2.4	R2		2	10	0.8
MSO				0.9	R1				1.2	R2				2.5
MSO				0.5	R1				1	R2				1
MSO				1	R1				0.9	R2				1.5
MSO		5	10	1.1	R1				0.8	R2				0.5
MSO				2.3	R1		7	10	1	R2				0.3
MSO				2	R1				0.9	R2				0.5
MSO				1.3	R1				0.8	R2				0.5
MSO				1	R1				1.3	R2				1
MSO				1	R1				1	R2				0.3
MSO				1.3	R1				0.5	R2		3	12	1
MSO				1.5	R1				1.3	R2				0.9
MSO				1	R1				1.6	R2				0.8
MSO				0.9	R1				0.5	R2				2.4
MSO		6	8	1.5	R1				0.5	R2				1.2
MSO				2.6	R1		8	6	1	R2				1
MSO				2.4	R1				0.5	R2				0.9
MSO				1.2	R1				0.3	R2				0.8
MSO				1	R1				0.3	R2				1
MSO				0.9	R1				0.3	R2				0.9
MSO				0.8	R1				0.2	R2				0.8
MSO				1.3	R1	7	1	8	1.2	R2				1.3
MSO		7	8	2	R1				1	R2		4	11	2.5
MSO				2.3	R1				1	R2				1
MSO				1.3	R1				0.9	R2				0.4
MSO				1.6	R1				0.6	R2				1.5
MSO				1.6	R1				1	R2				0.3
MSO				1.3	R1				1	R2				0.4
MSO				1	R1				0.5	R2				0.5
MSO				0.2	R1		2	9	1	R2				1
MSO		8	10	1	R1				0.2	R2				0.5
MSO				1.1	R1				1.5	R2				0.3
MSO				2.5	R1				1	R2				0.4
MSO				2.3	R1				0.5	R2		5	7	0.5
MSO				2	R1				0.2	R2				1
MSO				1.1	R1				0.3	R2				0.2
MSO				1.2	R1				1	R2				1.5
MSO				1.9	R1				1	R2				1
MSO				1	R1		3	10	0.5	R2				0.5
MSO				0.2	R1				0.9	R2				0.2
MSO	5	1	12	1.5	R1				0.2	R2		6	10	0.3
MSO				2	R1				0.8	R2				2.5
MSO				2	R1				0.9	R2				0.2
MSO				2.3	R1				1	R2				2
MSO				1.6	R1				0.3	R2				1
MSO				1.4	R1				0.3	R2				0.5
MSO				1	R1				1	R2				0.9
MSO				1.5	R1				0.2	R2				0.5
MSO				1.5	R1		4	7	1	R2				1
MSO				1	R1				0.5	R2				0.3
MSO		2	5	2.5	R1				1	R2		7	7	0.3
MSO				2	R1				0.9	R2				1
MSO				1.1	R1				0.6	R2				1
MSO				1	R1				0.5	R2				0.5
MSO				1.5	R1				2	R2				1
MSO		3	10	1	R1		5	6	1	R2				0.5
MSO				1.3	R1				0.9	R2				1
MSO				0.4	R1				0.5	R2		8	9	0.3
MSO				1.3	R1				0.5	R2				1
MSO				1.3	R1				1.2	R2				1
MSO				1.2	R1				0.5	R2				0.8
MSO				1	R1		6	9	0.5	R2				1
MSO				1	R1				0.5	R2				0.5
MSO				1	R1				1	R2				0.6
MSO				0.6	R1				1	R2				1
MSO		4	9	1.7	R1				0.8	R2				0.5
MSO				1	R1				0.8	R2	6	1	10	2
MSO				1.5	R1				0.5	R2				0.5
MSO				1.6	R1				0.5	R2				0.5
MSO				0.9	R1				1	R2				1
MSO				1.6	R1		7	8	0.5	R2				1.5
MSO				0.8	R1				0.3	R2				1.5
MSO				1.2	R1				0.5	R2				0.5
MSO				1	R1				0.5	R2				0.9
MSO		5	10	1.6	R1				1	R2				0.2
MSO				2	R1				0.3	R2				0.2
MSO				1.6	R1				0.3	R2		2	11	1.3
MSO				1.9	R1				0.5	R2				2
MSO				2	R1		8	5	0.9	R2				0.5
MSO				1.3	R1				0.2	R2				1.1
MSO				1	R1				0.2	R2				1.3
MSO				1.3	R1				0.2	R2				1.4
MSO				0.5	R1				0.3	R2				1
MSO				0.5						R2				1.3
MSO		6	9	1.1						R2				0.9
MSO				1.3						R2				1
MSO				1.4						R2				1
MSO				1						R2		3	9	0.2
MSO				1.3						R2				1.5
MSO				0.9						R2				1
MSO				1						R2				0.5
MSO				1						R2				2
MSO				0.2						R2				0.3
MSO		7	10	1.2						R2				0.4
MSO				2						R2				0.2
MSO				1.8						R2				0.5
MSO				1.7						R2		4	8	2.5
MSO				2						R2				1
MSO				0.9						R2				0.2
MSO				1.6						R2				0.2
MSO				0.8						R2				1.3
MSO				0.9						R2				0.5
MSO				1						R2				0.5
MSO		8	9	1.1						R2				1.1
MSO				1.3						R2		5	10	0.2
MSO				1						R2				1.5
MSO				1.2						R2				1
MSO				0.5						R2				0.5
MSO				1.3						R2				0.2
MSO				1.5						R2				0.3
MSO				1.3						R2				1
MSO				1.3						R2				1
MSO	6	1	10	1						R2				0.5
MSO				1.8						R2				1
MSO				1.7						R2		6	10	1
MSO				1.9						R2				0.9
MSO				1.5						R2				1
MSO				1						R2				1.5
MSO				0.9						R2				1
MSO				1						R2				1
MSO				1.5						R2				0.5
MSO				1						R2				0.5
MSO		2	8	1						R2				0.3
MSO				1.3						R2				0.9
MSO				1.6						R2		7	11	1
MSO				1.5						R2				0.5
MSO				0.9						R2				0.2
MSO				0.8						R2				1
MSO				0.7						R2				1.5
MSO				1						R2				0.2
MSO		3	9	2						R2				0.5
MSO				1.3						R2				1
MSO				1.5						R2				1
MSO				2						R2				0.9
MSO				1.2						R2				1
MSO				1.3						R2		8	8	2
MSO				1.3						R2				1.5
MSO				1.3						R2				1.3
MSO				1						R2				0.9
MSO		4	11	1						R2				1
MSO				1.8						R2				0.5
MSO				1.5						R2				0.2
MSO				2						R2				0.3
MSO				1.5						R2	7	1	11	1.8
MSO				0.9						R2				0.5
MSO				1.6						R2				1
MSO				2						R2				1.2
MSO				1.2						R2				0.6
MSO				0.5						R2				0.8
MSO				0.5						R2				0.3
MSO		5	10	1						R2				0.3
MSO				2.3						R2				0.2
MSO				1.8						R2				0.5
MSO				2.3						R2				0.3
MSO				1.3						R2		2	10	1
MSO				1.3						R2				1
MSO				1						R2				0.8
MSO				1						R2				0.8
MSO				0.8						R2				1.4
MSO				0.8						R2				1.3
MSO		6	8	1.4						R2				0.5
MSO				1.3						R2				0.6
MSO				2						R2				1
MSO				2.3						R2				0.9
MSO				1						R2		3	15	1
MSO				0.9						R2				1.8
MSO				0.6						R2				3
MSO				0.5						R2				1.8
MSO		7	9	2						R2				0.9
MSO				2.3						R2				0.2
MSO				3						R2				0.2
MSO				1.5						R2				1
MSO				1						R2				0.9
MSO				2.5						R2				1.5
MSO				1						R2				1.3
MSO				1						R2				0.3
MSO				0.5						R2				0.2
MSO		8	5	2						R2				0.5
MSO				1.9						R2				0.3
MSO				1.6						R2		4	10	1
MSO				0.6						R2				1
MSO				0.3						R2				0.8
MSO	7	1	10	2						R2				2.5
MSO				1.9						R2				0.5
MSO				2						R2				1.8
MSO				2						R2				1
MSO				1.7						R2				0.5
MSO				1						R2				0.3
MSO				1.8						R2				0.5
MSO				3						R2		5	8	0.5
MSO				1.8						R2				0.6
MSO				0.9						R2				1
MSO		2	9	2.5						R2				0.9
MSO				1						R2				1
MSO				1.5						R2				1.8
MSO				2						R2				3
MSO				1.3						R2				1.8
MSO				2						R2		6	9	2.5
MSO				0.9						R2				1
MSO				1						R2				1.3
MSO				1						R2				0.8
MSO		3	10	1.5						R2				0.5
MSO				3.5						R2				0.3
MSO				2.3						R2				1
MSO				1.3						R2				1
MSO				1.5						R2				0.8
MSO				1.6						R2		7	8	1.5
MSO				1.5						R2				1.7
MSO				1.3						R2				1
MSO				0.5						R2				0.5
MSO				0.8						R2				0.3
MSO		4	10	1.8						R2				1
MSO				3						R2				1
MSO				1.5						R2				0.8
MSO				2						R2		8	9	1.3
MSO				3.2						R2				0.9
MSO				2						R2				1
MSO				1.9						R2				1
MSO				0.9						R2				0.2
MSO				1.3						R2				1.5
MSO				1.3						R2				1
MSO		5	11	3						R2				0.5
MSO				2.5						R2				0.2
MSO				1
MSO				1.9
MSO				2
MSO				2.2
MSO				1.8
MSO				1
MSO				0.9
MSO				0.9
MSO				1
MSO		6	12	2.6
MSO				1
MSO				1.6
MSO				3.2
MSO				3.5
MSO				2
MSO				2.3
MSO				2.2
MSO				1
MSO				0.8
MSO				1.3
MSO				1.3
MSO		7	7	3.5
MSO				2.6
MSO				2
MSO				1
MSO				0.5
MSO				1.2
MSO				0.3
MSO		8	14	1.9
MSO				3.5
MSO				2
MSO				1.9
MSO				1.5
MSO				1.6
MSO				2.9
MSO				1.5
MSO				1.3
MSO				1
MSO				2.2
MSO				2
MSO				1.3
MSO				1.3
